1 **Wastewater-based surveillance for tracing the circulation of Dengue and Chikungunya**  
2 **viruses**

3 Sílvia Monteiro, Raquel Pimenta, Filipa Nunes, Mónica V. Cunha, Ricardo Santos

4  
5 Laboratório de Análises, Instituto Superior Técnico, Universidade de Lisboa, Portugal (Sílvia  
6 Monteiro, Raquel Pimenta, Filipa Nunes, Ricardo Santos); CERIS – Civil Engineering  
7 Research and Innovation for Sustainability, Instituto Superior Técnico, Universidade de Lisboa  
8 (Sílvia Monteiro, Ricardo Santos); DECN - Departament of Nuclear Sciences and Engineering,  
9 Técnico Lisboa, Instituto Superior Técnico (Sílvia Monteiro, Ricardo Santos)  
10 Centre for Ecology, Evolution and Environmental Changes (cE3c) & CHANGE - Global  
11 Change and Sustainability Institute, Faculdade de Ciências, Universidade de Lisboa, Lisboa,  
12 Portugal (Mónica V. Cunha); Biosystems & Integrative Sciences Institute (BioISI), Faculdade  
13 de Ciências, Universidade de Lisboa, Lisboa, Portugal (Mónica V. Cunha)

14  
15  
16

17 Correspondence to:

18 Dr. Sílvia Monteiro and Dr. Ricardo Santos, Instituto Superior Técnico, Avenida Rovisco Pais,  
19 1049-001 Lisbon, Portugal

20  
21

22 Keywords: Dengue virus; Chikungunya virus; wastewater-based surveillance; arboviral  
23 disease; RT-qPCR

24 .

25 Summary

26 **Background:** Arboviral diseases, transmitted by infected arthropods, pose significant  
27 economic and societal threats. Their global distribution and prevalence have increased in  
28 recent years, driven by factors such as climate change, biodiversity loss and urbanization.  
29 These diseases are often underestimated due to uneven surveillance and asymptomatic  
30 cases. Current surveillance relies on monitoring vector occurrence and spatial distribution, as  
31 well as syndromic monitoring. In this work, we aimed to explore the utility of wastewater-based  
32 surveillance as an additional, added-value tool for vector-borne viruses tracking.

33 **Methods:** A retrospective wastewater-based surveillance survey was conducted at ten  
34 wastewater treatment plants covering a large part of Portugal mainland (North, Lisboa and  
35 Vale do Tejo and South regions). Using RT-qPCR, we quantified the RNA concentrations of  
36 Dengue (DENV) and Chikungunya (CHIKV) viruses for a period of 12 months ( $n = 273$  raw  
37 wastewater samples), ranging May 2022 - April 2023.

38 **Findings:** DENV was detected in 25% of the samples, with concentrations spanning from 3.5  
39 to 6.8 log copies/L. CHIKV was detectable in 11% of the samples, with concentrations up to  
40 6.3 log copies/L. Notably, the occurrence of DENV and CHIKV was rather similar between the  
41 three regions. The Lisboa and Vale do Tejo region exhibited in general the highest median  
42 concentration for DENV and CHIKV following normalization with crAssphage ( $1.5 \times 10^{-4}$  and  
43  $1.1 \times 10^{-3}$ , respectively).

44 **Interpretation:** We demonstrate the efficacy of wastewater-based surveillance as a potent  
45 tool for gauging the epidemiological landscape of both DENV and CHIKV in mainland Portugal,  
46 where autochthonous cases have not been detected yet. Therefore, WBS should be integrated  
47 as a supplementary component to standard surveillance strategies.

48

49 **Research in context**  
50 **Evidence before this study**

51 Wastewater serves as a valuable resource for wastewater-based surveillance (WBS). This  
52 surveillance method involves analyzing biomarkers of human metabolism, activities and  
53 lifestyle in wastewater to gain insights into public health trends. Previously, WBS has been  
54 employed to track chemical substances like illicit drugs, including cocaine, as well as  
55 oseltamivir during the 2009 influenza pandemic. It has also played a crucial role in the global  
56 polio eradication program by contributing to assess poliovirus circulation in populations and  
57 evaluating immunization effectiveness.

58 During the SARS-CoV-2 pandemic, there was a significant boost in wastewater-based  
59 surveillance. To the best of our knowledge, our study represents the first extensive application  
60 of this approach to comprehensively investigate and identify the presence of vector-borne  
61 viruses RNA such as chikungunya and dengue.

62 In December 2022, we conducted a search on PubMed and Google Scholar for publications  
63 using the search terms "wastewater" and "dengue virus" or "chikungunya virus" or "West Nile  
64 virus" or "Zika virus", encompassing manuscripts in all languages. Our search yielded only  
65 one study that focused on detecting arboviruses in wastewater, specifically Dengue.  
66 Surprisingly, the authors were unable to detect viral RNA despite the reported cases of Dengue  
67 between 2017 and 2019, when the wastewater samples were collected. This period included  
68 a major outbreak in 2019, with more than 7,000 confirmed cases. Remarkably, no other study  
69 has shed light on the presence and concentration of Dengue and Chikungunya viral RNA in  
70 wastewater.

71  
72 **Added value of this study**

73 In response to the gap identified in the literature review, this study makes a significant  
74 contribution by reporting for the first time the presence and concentration of arboviral RNA,  
75 specifically focusing on the Dengue and Chikungunya viruses. Notably, it has demonstrated  
76 the circulation of these viruses, even when only a few travel-associated cases have been  
77 reported throughout the years and where no autochthonous have been reported within the  
78 community, although the vector (*Aedes albopictus*) has been identified in several occasions in  
79 mainland Portugal. This research underscores the vital role of wastewater-based surveillance  
80 in gaining insights into the circulation trends of underreported pathogens within communities  
81 at the sewershed level.

82  
83 **Implications of the available information**

84 Arboviral infections are significantly underreported, especially in non-endemic countries, and  
85 they can lead from mild to severe health issues and even mortality. The symptoms are  
86 unspecific and resemble those of various other illnesses, such as Influenza and COVID-19.  
87 Consequently, many infected individuals may not seek medical assistance, and when they do,  
88 their infections might be misdiagnosed. This results in surveillance for arboviral infections  
89 being biased toward individuals presenting with unusual symptoms or severe illness, or  
90 returning from endemic regions, leading to delayed reporting and limited temporal and spatial  
91 accuracy.

92 In contrast, wastewater surveillance provides results within 24 hours of sample collection and  
93 offers a representation of the population served by the sewer system. This includes  
94 asymptomatic individuals and those with mild symptoms who may not seek medical care. This  
95 approach increases the likelihood of detecting viral circulation and thus prompt public health

96 intervention, namely through vector control, limiting the potential transmission to new hosts,  
97 breaking the cycle of transmission.

98 Wastewater surveillance data can play a crucial role in informing public health and  
99 environmental decision-making. It can reveal the presence of unaccounted-for infections,  
100 indicating the need for control and mitigation strategies, both at the population and mosquito  
101 vector levels. Although the arboviral activity is assumed residual in Portugal, wastewater  
102 monitoring can be used in complement to the efforts that are already done under the National  
103 Vector Surveillance Network. Moreover, this data can be used to communicate with the  
104 general public, encouraging them to take actions that can help control the mosquito  
105 population, such as reducing stagnant water sources where mosquitoes lay their eggs. This  
106 is especially important for vulnerable populations, enabling them to make more informed  
107 decisions to mitigate the underlying risks effectively.

108

## 109 **Introduction**

110 Arboviruses, which encompass a diverse range of viruses, including Chikungunya virus  
111 (CHIKV) and Dengue virus (DENV), are a heterogeneous group hailing from multiple viral  
112 families. These viruses are transmitted to humans through arthropod vectors, primarily  
113 mosquitoes and ticks. The array of arboviruses linked to human diseases surpasses a  
114 hundred, resulting in considerable disease burden and socioeconomic implications, especially  
115 in tropical and subtropical regions<sup>1</sup>. Presently, arboviruses pose a global public health concern  
116 due to the influences of climate change, globalization, biodiversity loss, landscape  
117 homogenization and urbanization<sup>2,3</sup>.

118 Among arboviruses, DENV stands out as the most clinically significant, as it is endemic in over  
119 100 countries<sup>4</sup>. Its far-reaching presence contributes to an estimated 390 million infections  
120 annually, with only approximately 25% of these cases reporting symptoms<sup>5</sup>. Conversely,  
121 CHIKV has instigated extensive outbreaks across Africa, Asia, and the Americas; however, it  
122 has subsequently extended its reach to regions where previously it was not native, including  
123 Europe<sup>6</sup>.

124 Assessing the presence of arboviruses such as DENV and CHIKV involves multiple  
125 approaches, including clinical surveillance and monitoring within the sylvatic and  
126 entomological cycles. Clinical surveillance remains the primary method for tracking arboviral  
127 diseases. However, it is estimated that over 50% of arboviral infections may be asymptomatic  
128 or exhibit mild symptoms<sup>7</sup>. Additionally, non-severe arboviral infections often manifest with  
129 nonspecific symptoms, complicating early outbreak detection<sup>8</sup>.

130 On the other hand, monitoring arbovirus circulation in the sylvatic and entomological cycles is  
131 also commended. However, this approach presents challenges, such as the need to capture  
132 animals and trap insect reservoirs. Moreover, using the presence of insect reservoirs as proxy  
133 for human infections may not reflect the epidemiological scenario<sup>9</sup>. Therefore, both clinical  
134 surveillance and vector cycle-based monitoring lack sensitivity and specificity, are resource-  
135 intensive, and lack spatial precision<sup>10,11</sup>.

136 The Asian tiger mosquitoes, *Aedes albopictus* and *Aedes aegypti*, act as the primary vectors  
137 of DENV and CHIKV. *A. albopictus* was detected for the first time in mainland Portugal, in the  
138 North region, by the end of July 2017, and associated to international trade of used tires that  
139 can be used by mosquito as oviposition site. Detection in the Algarve region was subsequently  
140 reported. Imported dengue cases have been identified in mainland Portugal, although there is  
141 no evidence of local transmission (SNS 24: [https://www.sns24.gov.pt/tema/doencas-  
142 infecciosas/dengue/#vivo-em-portugal-devo-preocupar-me-com-o-risco-de-infecao-pelo-  
143 virus-da-dengue](https://www.sns24.gov.pt/tema/doencas-infecciosas/dengue/#vivo-em-portugal-devo-preocupar-me-com-o-risco-de-infecao-pelo-virus-da-dengue). Last accessed: 30 august 2023).

144 Given the limitations of current surveillance methodologies for arboviral diseases concerning  
145 particularly the asymptomatic and mild cases, there is a pressing need for rapid, near-real-  
146 time approaches to determine the extent of arboviral circulation in human populations.  
147 Wastewater-based surveillance (WBS) has successfully been used to trace pharmaceuticals,  
148 illicit drugs, and even polio. It was extensively employed during the severe acute respiratory  
149 syndrome coronavirus 2 (SARS-CoV-2) pandemic<sup>13</sup>. Studies have confirmed the excretion of  
150 DENV and CHIKV RNA in urine at concentrations as high as 5·2 log<sub>10</sub> copies/mL for DENV.<sup>14</sup>  
151 Additionally, research has indicated that DENV RNA can persist for several days at  
152 temperatures as high as 37 °C, suggesting that monitoring of viral RNA in wastewater could  
153 complement clinical surveillance for arboviral diseases<sup>15</sup>.

154 In this study, we present a nation-wide analysis of DENV and CHIKV RNA in raw wastewater  
155 across Portugal over a 54-week period. The CrAssphage served as a normalization factor to  
156 adjust the arboviral concentrations, taking into consideration the varying dilution rates of raw  
157 urban wastewater and the shifting proportion of human fecal material over time.<sup>16</sup> These

158 factors, influenced by stormwater, industrial discharges, and water infiltration, could potentially  
159 lead to misinterpretations when utilizing WBS. The insights gained from this research will  
160 advance our understanding of the potential underlying wastewater-based surveillance for  
161 monitoring arboviral outbreaks, including those caused by DENV and CHIKV, especially in  
162 non-endemic regions.

163

## 164 **Methods**

### 165 **Study design**

166 Twice a month, raw wastewater samples ( $n = 273$ ) were systematically collected from ten  
167 wastewater treatment facilities situated across the North ( $n = 75$  samples), Lisboa and Vale  
168 do Tejo ( $n = 98$ ), and South ( $n = 100$ ) regions of Portugal, from May 2022 to April 2023  
169 (appendix page 7). Employing automated samplers (ISCO, USA), 24-hour composite samples  
170 were collected. Following collection, the samples were promptly refrigerated and transported  
171 to the laboratory within an 8-hour window, where they were immediately processed.

172

### 173 **Processing of raw wastewater**

174 To concentrate the samples, a hollow fiber method following the procedure outlined by  
175 Monteiro and colleagues was employed (appendix pp 2)<sup>17</sup>. In brief, 1 liter of raw wastewater  
176 underwent concentration using Inuvai R180 hollow-fiber filters (Inuvai, a division of Fresenius  
177 Medical Care, Germany). The elution of samples was conducted in 300 mL of 1x phosphate-  
178 buffered saline (PBS) supplemented with 0.01% sodium polyphosphate (NaPP) and 0.01%  
179 Tween 80/0.001% antifoam, with subsequent overnight precipitation with 20% polyethylene  
180 glycol (PEG) 8000. Samples were subjected to centrifugation at 10,000 xg for 30 minutes,  
181 followed by resuspension in 5 mL of 1x PBS at pH 7.4. The samples were stored at  $(-80 \pm 10)$   
182 °C until further processing.

183

### 184 **Viral RNA extraction, detection, and quantification**

185 Nucleic acid extraction was carried out on 220  $\mu$ L of concentrated samples using the QIAamp  
186 FAST DNA Stool Mini kit (QIAGEN, Germany) with a final elution volume of 100  $\mu$ L, following  
187 the manufacturer's instructions (appendix pp 2).

188 The primers and probes employed in this study can be found in Table 1. For DENV RNA  
189 detection, the focus was on a segment in the 3'-untranslated region (3'UTR), while CHIKV  
190 RNA detection targeted both the Nsp1 and the E region<sup>18-20</sup>. Quantification of crAssphage was  
191 executed using the previously established CPQ\_056 assay<sup>21</sup>.

| Target             | Sequence 5' – 3'              | Size (bp) | Ref. |
|--------------------|-------------------------------|-----------|------|
| DENV Forward       | GARAGACCAGAGATCCTGCTGTCT      |           |      |
| Reverse            | ACCATTCATTCTTCTGGCGTT         | 73        | 18   |
| Probe              | AGCATCATTCCAGGCAC             |           |      |
| CHIKV Nsp1 Forward | TGATCCCGACTCAACCATCCT         |           |      |
| Reverse            | GGCAAACGCAGTGGTACTTCCT        | 82        | 19   |
| Probe              | TCCGACATCATCCTCCTTGCTGGC      |           |      |
| CHIKV E Forward    | TCACTCCCTGTTGGACTTGATAGA      |           |      |
| Reverse            | TTGACGAACAGAGTTAGGAACATACC    | 125       | 20   |
| Probe              | AGGTACGCGCTTCAAGTTCGGCG       |           |      |
| crAssphage Forward | CAGAAGTACAACTCCTAAAAAACGTAGAG |           |      |
| Reverse            | GATGACCAATAACAAGCCATTAGC      | 125       | 21   |
| Probe              | AATAACGATTTACGTGATGTAAC       |           |      |

Primers and probes were purchased from Eurogentec (Seraing, Belgium). All probes contained fluorescent molecules and quenchers (5' FAM or HEX/BHQ1 or MGB); HEX, hexachloro-



fluorescein; FAM, 6-fluorescein amidite; BHQ1, black hole quencher 1; MGB, minor groove binder.

192 **Table 1: Forward and reverse primers and probe sequences used in this study for the detection**  
193 **of viral RNA/DNA.**

194

195 Detection of DENV and CHIKV involved one-step RT-qPCR assays (Luna Universal Probe  
196 One-Step RT-qPCR, New England Biolabs, USA), while qPCR assay (PerfeCTa qPCR  
197 ToughMix, Quantabio, USA) was used for crAssphage quantification. To detect viral nucleic  
198 acids, 4-fold dilutions of each viral extract were concurrently assayed alongside crude extracts  
199 to overcome any potential inhibition of amplification caused by the complex nature of the  
200 samples.

201 The reaction mixture's final volume was 15  $\mu$ L, consisting of 800 nM of each primer, 200 nM  
202 of probe, and 5  $\mu$ L of the extracted viral nucleic acid. RT-qPCR for DENV and CHIKV followed  
203 a temperature profile of 55  $^{\circ}$ C for 10 min, 95  $^{\circ}$ C for 10 min, and 45 cycles of amplification at  
204 95  $^{\circ}$ C for 15 s, and 60  $^{\circ}$ C for 1 min. The qPCR for crAssphage was conducted at 95  $^{\circ}$ C for 10  
205 min, followed by 45 cycles of amplification at 95  $^{\circ}$ C for 15 s, and 60  $^{\circ}$ C for 1 min. All  
206 amplification reactions were performed using a QuantStudio 5 Real-Time PCR System  
207 (ThermoScientific, USA).

208 Quantification of DENV and CHIKV was achieved through calibration curves utilizing 5- and  
209 10-fold dilutions of the TaqMan Arbovirus Triplex Control Kit (ZIKV/DENV/CHIKV)  
210 (ThermoScientific, USA), ranging from 6.0 to 6.0 $\times$ 10<sup>3</sup> and 1.0 to 1.0 $\times$ 10<sup>4</sup> genome copies (gc)  
211 per reaction. Standard curves for crAssphage were generated from genomic crAssphage DNA  
212 and quantified as per the guidelines in appendix (pp 2). The performance details of the  
213 standard curves can be found in appendix pp 3. Negative controls, including extraction and  
214 RT-qPCR assays, were also carried out using DNase/RNase-free distilled water (appendix pp  
215 4-6).

216

## 217 **Validation of arboviral detection in wastewater by sequencing**

218 To validate the detection of DENV and CHIKV in wastewater samples, the amplicons were  
219 visualized after electrophoresis on a 4.0% agarose gel, and ethidium staining. The bands with  
220 the correct size (Table 1) were excised from the gel and extracted using the EXTRACTME  
221 DNA clean-up gel-out kit (Bliirt, Poland) following the manufacturer's instructions. The DNA  
222 was recovered in final volume of 50  $\mu$ L. Positive controls for both viruses were also sequenced  
223 in parallel with the samples. The sequencing was conducted by an external laboratory. Upon  
224 receiving the sequences, the results were checked and compared with publicly available  
225 sequences by using the BLAST program of the National Center for Biotechnology Information  
226 (available from: URL:  
227 [https://blast.ncbi.nlm.nih.gov/Blast.cgi?PROGRAM=blastn&BLAST\\_SPEC=GeoBlast&PAGE](https://blast.ncbi.nlm.nih.gov/Blast.cgi?PROGRAM=blastn&BLAST_SPEC=GeoBlast&PAGE_TYPE=BlastSearch)  
228 [\\_TYPE=BlastSearch](https://blast.ncbi.nlm.nih.gov/Blast.cgi?PROGRAM=blastn&BLAST_SPEC=GeoBlast&PAGE_TYPE=BlastSearch)).

229

## 230 **Statistical analysis**

231 Data analysis was conducted using SPSS version 26 (IBM Corporation, USA) and RStudio  
232 (version 2023.06.1-524). Figures were generated with RStudio, employing the ggplot2  
233 package (version 3.4.0).

234 In preparation for statistical analyses, all positive data underwent a log transformation.  
235 Quantitative analysis was exclusively performed on positive samples, with non-detects (ND)  
236 being excluded from quantitative calculations. The normality of the data was assessed using  
237 the Shapiro-Wilk test. The study employed the Kruskal-Wallis test (KW statistics) to assess  
238 variations in viral RNA concentration across different regions and seasons. Additionally,  
239 Spearman's rank correlation coefficient was utilized to identify potential relationships between  
240 the three viral targets (DENV, CHIKV – Nsp1, and CHIKV – E). Differences were considered  
241 statistically significant if  $p < 0.05$ .

## 242 **Results**

243 The control experiments yielded the anticipated outcomes (including negative and positive  
244 extraction and amplification controls). The median concentration of crAssphage, utilized for  
245 normalizing arboviral concentration across all samples, was  $6.8 \times 10^8$  copies/L, with a range  
246 of  $4.4 \times 10^6$  to  $5.5 \times 10^9$  copies/L and an interquartile range between  $2.7 \times 10^8$  and  $1.2 \times 10^9$   
247 copies/L. Our study's crAssphage concentration results align with findings from previously  
248 published studies.<sup>22,23</sup>

249 The RNA from all viruses under scrutiny was consistently detected in raw urban wastewater  
250 samples (see Figure 1). DENV was consistently present throughout the sampling period, while  
251 CHIKV detection was more prevalent in 2023, particularly during March and April. Specifically,  
252 DENV was found in 68 samples (25%), while CHIKV was detected in 30 samples (11%).  
253 Among the samples positive for arboviral RNA, 62 (67%) were positive for DENV, 24 (26%)  
254 for CHIKV, and, overall, both viruses were concomitantly detected in six (7%) of raw urban  
255 wastewater samples.

256 Regarding DENV, the highest positivity rate during the study period occurred in September  
257 2022 (59%), and the lowest was in January 2023 (4%). As for CHIKV, the first detection was  
258 observed in a single sample from the LVT region in December 2022 (see Figure 1F), and the  
259 highest positivity rate was noted in April 2023. The trends for DENV varied slightly across the  
260 three regions. Initially, the highest detection rate occurred in the North and LVT regions (33%).  
261 The positivity rate in the North region decreased until August, while an increase in positive  
262 samples was registered for the LVT and South regions until September 2022, with rates  
263 reaching up to 75% for LVT and 63% for the South region. Two additional peaks were observed  
264 in the North region, in September and October 2022, as well as between February and April  
265 2023. In the LVT region, there was a sharp decrease in positivity rate after October 2022,  
266 followed by an increase from February 2023 onward. In the South region, a peak was detected  
267 between December 2022 and February 2023, with no positive samples in March and April  
268 2023.

269 For CHIKV, the LVT region showed the first positive samples in December 2022, with  
270 subsequent detections in January (13%), March (38%), and April (63%). The North and South  
271 regions had their first positive samples in March 2023 (33% and 50%, respectively), with all  
272 April samples testing positive in both regions.

273 The normalized concentrations ranged between a median of  $1.1 \times 10^{-4}$  and  $7.8 \times 10^{-4}$  copies/L  
274 for DENV and the CHIKV gene E (see Figure 2; Table 2).

275



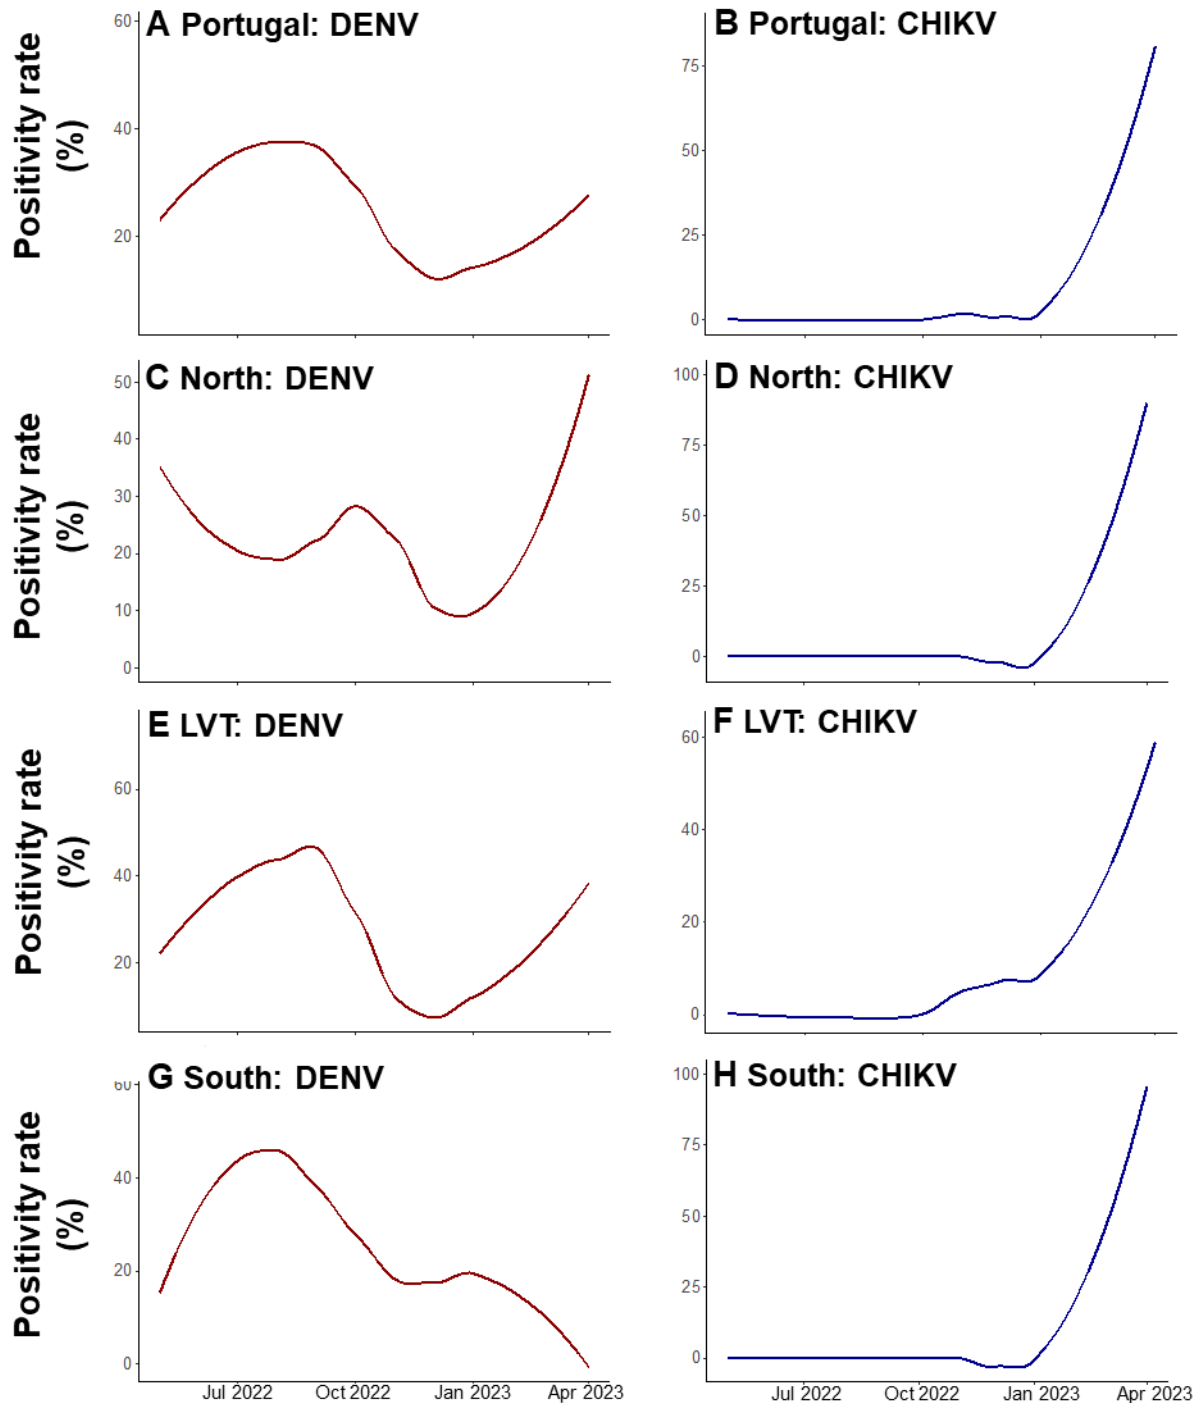

276

277 **Figure 1: Portugal- and Portuguese regions-aggregated positivity rates in raw urban wastewater**  
278 Report of bimonthly measurements. (A) Positive rate for DENV in Portugal. (B) Positive rate for CHIKV  
279 in Portugal, includes the genes Nsp1 and E. (C) Positivity rate for DENV in the North region; (D)  
280 Positivity rate for CHIKV in the North region (Nsp1 and E). (E) Positivity rate for DENV in the LVT region;  
281 (F) Positivity rate for CHIKV in the LVT region (Nsp1 and E). (G) Positivity rate for DENV in the South  
282 region. (H) Positivity rate for CHIKV in the South region (Nsp1 and E). Measurements were conducted  
283 between May 2022 and April 2023. DENV = dengue virus. CHIKV = chikungunya virus.

284

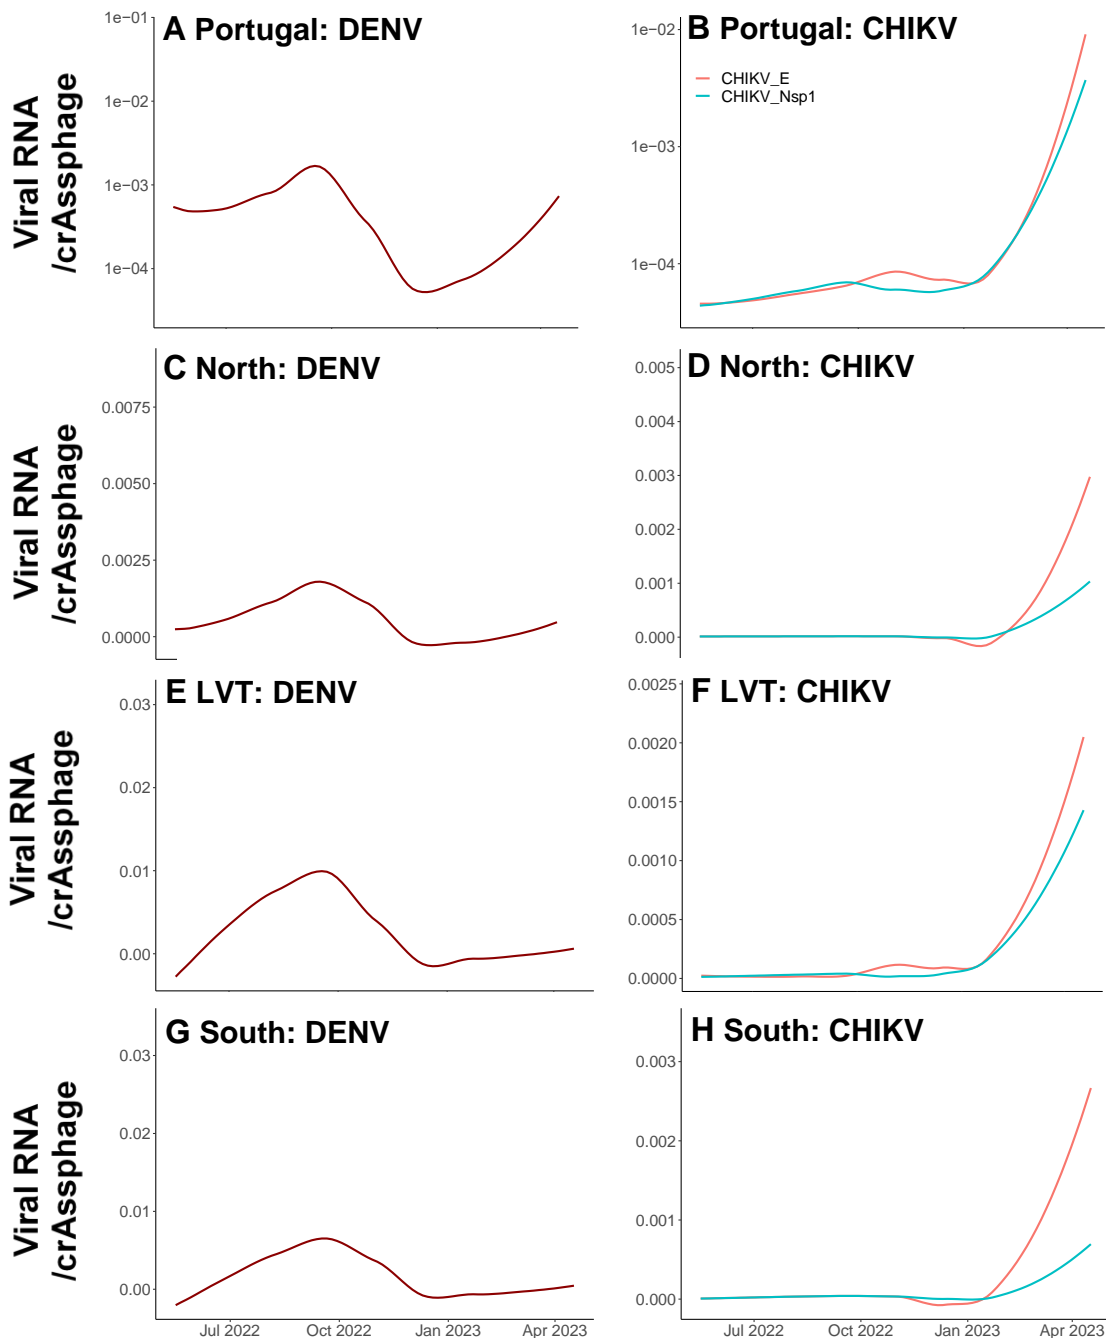

285

286 **Figure 2:** Portugal- and Portuguese regions-aggregated normalized concentration of arboviral RNA in  
 287 urban raw wastewater  
 288 Report of bimonthly measurements. (A) Normalized concentration of DENV in Portugal. (B) Normalized  
 289 concentration of CHIKV in Portugal, expressed by the genes Nsp1 and E. (C) Normalized concentration  
 290 of DENV in the North region; (D) Normalized concentration of CHIKV in the North region (expressed by  
 291 the Nsp1 and E genes). (E) Normalized concentration of DENV in the LVT region; (F) Normalized  
 292 concentration of CHIKV in the LVT region (expressed by the Nsp1 and E genes). (G) Normalized  
 293 concentration of DENV in the South region. (H) Normalized concentration of CHIKV in the South region  
 294 (expressed by the Nsp1 and E genes). Measurements were conducted between May 2022 and April  
 295 2023. DENV = dengue virus. CHIKV = chikungunya virus.

296 The median normalized concentration of the CHIKV Nsp1 gene was similar ( $3.1 \times 10^{-4}$   
297 copies/L). Generally, the South region exhibited the lowest average concentrations, while the  
298 LVT region had the highest. For DENV, the normalized concentration varied between  $2.4 \times 10^{-6}$   
299 <sup>6</sup> copies/L in the South region and  $1.5 \times 10^{-4}$  copies/L in the LVT region. The concentration of  
300 the E gene followed a similar trend, with the highest median concentration ( $1.1 \times 10^{-3}$  copies/L)  
301 in the LVT region and the lowest ( $4.0 \times 10^{-4}$  copies/L) in the North region. However, the  
302 concentration for the Nsp1 gene was very similar across regions (ranging from  $1.5 \times 10^{-4}$  to  
303  $5.1 \times 10^{-4}$  copies/L for the South and North regions, respectively). No statistically significant  
304 differences were observed in the normalized RNA viral concentration among the three  
305 locations (DENV: KW = 2.738, degrees of freedom = 2, p = 0.25; CHIKV – Nsp1: KW = 3.864,  
306 degrees of freedom = 2, p = 0.15; CHIKV – E: KW = 0.437, degrees of freedom = 2, p = 0.80).

307

|              | Median viral RNA normalized (concentration) | Min – Max viral RNA normalized concentration (concentration) | Positive samples (%) |
|--------------|---------------------------------------------|--------------------------------------------------------------|----------------------|
| Country      |                                             |                                                              |                      |
| DENV         | $1.1 \times 10^{-4}$ ( $8.6 \times 10^4$ )  | $0 - 2.8 \times 10^{-2}$ ( $0 - 5.9 \times 10^6$ )           | 68 (25%)             |
| CHIKV – Nsp1 | $3.1 \times 10^{-4}$ ( $2.6 \times 10^5$ )  | $0 - 1.6 \times 10^{-3}$ ( $0 - 1.0 \times 10^6$ )           | 20 (7%)              |
| CHIKV - E    | $7.8 \times 10^{-4}$ ( $3.3 \times 10^5$ )  | $0 - 2.9 \times 10^{-3}$ ( $0 - 1.9 \times 10^6$ )           | 20 (7%)              |
| North        |                                             |                                                              |                      |
| DENV         | $2.6 \times 10^{-6}$ ( $8.5 \times 10^4$ )  | $0 - 4.8 \times 10^{-3}$ ( $0 - 3.9 \times 10^6$ )           | 18 (24%)             |
| CHIKV – Nsp1 | $5.1 \times 10^{-4}$ ( $3.4 \times 10^5$ )  | $0 - 1.6 \times 10^{-3}$ ( $0 - 5.3 \times 10^5$ )           | 4 (5%)               |
| CHIKV - E    | $4.0 \times 10^{-4}$ ( $4.0 \times 10^5$ )  | $0 - 2.9 \times 10^{-3}$ ( $0 - 1.2 \times 10^6$ )           | 6 (8%)               |
| LVT          |                                             |                                                              |                      |
| DENV         | $1.5 \times 10^{-4}$ ( $1.3 \times 10^5$ )  | $0 - 2.8 \times 10^{-2}$ ( $0 - 5.9 \times 10^6$ )           | 26 (27%)             |
| CHIKV – Nsp1 | $4.5 \times 10^{-4}$ ( $4.1 \times 10^5$ )  | $0 - 1.5 \times 10^{-3}$ ( $0 - 1.0 \times 10^6$ )           | 8 (8%)               |
| CHIKV - E    | $1.1 \times 10^{-3}$ ( $3.0 \times 10^5$ )  | $0 - 2.0 \times 10^{-3}$ ( $0 - 1.9 \times 10^6$ )           | 6 (6%)               |
| South        |                                             |                                                              |                      |
| DENV         | $2.4 \times 10^{-6}$ ( $5.5 \times 10^4$ )  | $0 - 2.9 \times 10^{-2}$ ( $0 - 3.0 \times 10^6$ )           | 24 (24%)             |
| CHIKV – Nsp1 | $1.5 \times 10^{-4}$ ( $1.8 \times 10^5$ )  | $0 - 4.5 \times 10^{-4}$ ( $0 - 5.1 \times 10^5$ )           | 8 (8%)               |
| CHIKV - E    | $6.4 \times 10^{-4}$ ( $3.5 \times 10^5$ )  | $0 - 2.0 \times 10^{-3}$ ( $0 - 1.4 \times 10^6$ )           | 8 (8%)               |

Viral RNA concentration is copies per L of wastewater sample. The normalization was performed using the following formula:  $C_{\text{viralRNA}}/C_{\text{crassphage}}$ , where  $C_{\text{viralRNA}}$  is the concentration of each specific target and  $C_{\text{crassphage}}$  is the concentration of crAssphage in the same wastewater samples. DENV = Dengue virus. CHIKV – Nsp1 = Chikungunya – nonstructural viral protein 1. CHIKV – E = Chikungunya – envelope protein

308 **Table 2:** Summary statistics of the detection of DENV and CHIKV in wastewater samples

309

310 In general, the concentration of DENV was lowest between the end of October 2022 and the  
311 beginning of January 2023, with the highest concentrations observed between September and  
312 October 2022, and a resurgence at the start of 2023, except for the South region where DENV  
313 remained mostly undetected. For CHIKV, the virus was primarily undetected during 2022 but  
314 saw a steep increase from January until the end of the time series. The non-normalized  
315 concentration followed a similar trend to that of the normalized concentration for both viruses  
316 (appendix pp 8). Concentrations of both CHIKV genes were positively correlated with each  
317 other ( $r = 0.44$ ,  $p < 0.001$ ), while no significant association was found between DENV and  
318 CHIKV genes (appendix pp 9). The limited occurrence of CHIKV throughout the sampling  
319 period contributed to this result.

320 The impact of the four different seasons on the occurrence of viral RNA was evaluated.  
321 Statistically significant differences were observed for all targets (DENV, CHIKV – Nsp1, and

322 CHIKV – E) ( $p < 0.001$ ). For DENV, the difference was notable between warmer seasons  
323 (spring and summer) and colder seasons (fall and winter), with higher concentrations and  
324 positivity rates found during the warmer months (appendix pp 9, 10). Conversely, CHIKV was  
325 more dominant during spring, with a statistically significant difference observed between  
326 spring and the other seasons (appendix pp 9, 10).

327 The sequencing data, although not being able to provide discrimination between viruses (in  
328 the case of dengue, serotypes) and therefore not being able to establish a phylogenetic tree,  
329 due to the small size of the fragments, confirmed the detection of each virus in the positive  
330 samples.

331

### 332 **Discussion**

333 To the best of our knowledge, this is the first study to document the presence of RNA from  
334 DENV and CHIKV in raw urban wastewater samples.

335 DENV was detected throughout the study whereas CHIKV RNA was seldomly detected in  
336 wastewater. CHIKV and DENV co-occurred in six samples (7%). Both viruses co-circulate in  
337 many regions of the globe, implying that these viruses can be spread simultaneously to other  
338 regions where the viruses are not endemic (ECDC: [https://www.ecdc.europa.eu/en/mosquito-](https://www.ecdc.europa.eu/en/mosquito-borne-diseases)  
339 [borne-diseases](https://www.ecdc.europa.eu/en/mosquito-borne-diseases). Last accessed: October 2023). Moreover, the co-circulation of both viruses  
340 and of the vectors facilitates the occurrence of concurrent infection in the human population.<sup>24</sup>

341 An association between viral RNA in raw urban wastewater and clinical surveillance could not  
342 be established, given the absence of data, encompassing both autochthonous and travel-  
343 associated cases, of CHIKV and DENV in Portugal from August 2022 to July 2023 (Turismo  
344 de Portugal: [https://travelbi.turismodeportugal.pt/turismo-em-portugal/turismo-em-numeros-](https://travelbi.turismodeportugal.pt/turismo-em-portugal/turismo-em-numeros-2022/)  
345 [2022/](https://travelbi.turismodeportugal.pt/turismo-em-portugal/turismo-em-numeros-2022/). Last accessed: October 2023).

346 Between 2015 and 2021, Portugal reported only three cases of CHIKV and 96 cases of DENV,  
347 all travel-associated (ECDC: [https://www.ecdc.europa.eu/en/surveillance-atlas-infectious-](https://www.ecdc.europa.eu/en/surveillance-atlas-infectious-diseases)  
348 [diseases](https://www.ecdc.europa.eu/en/surveillance-atlas-infectious-diseases). Last accessed: October 2023). However, changing climate, which favors vector  
349 activity and viral replication, coupled with increased globalization (including travel, migration,  
350 and international trade), is expected to lead to a rise in CHIKV and DENV cases across  
351 Europe. In fact, the *A. albopictus* is presently expanding across Europe temperate and  
352 Mediterranean regions, being established in Italy, France, and Spain, among other countries,  
353 where it has mostly been associated to intermittent and short-lived outbreaks rather than  
354 continuous transmission (ECDC: [https://www.ecdc.europa.eu/en/publications-data/aedes-](https://www.ecdc.europa.eu/en/publications-data/aedes-albopictus-current-known-distribution-august-2023)  
355 [albopictus-current-known-distribution-august-2023](https://www.ecdc.europa.eu/en/publications-data/aedes-albopictus-current-known-distribution-august-2023). Last accessed: October 2023).

356 DENV exhibited its highest concentration and positivity rate in September 2022, with a  
357 resurgence between March and April 2023. In contrast, CHIKV was predominantly detected  
358 from January 2023 onward. There is no discernible seasonality associated with either virus,  
359 and the peak in the number of cases in Europe varies from year to year, influenced by climatic  
360 conditions and fluctuating travel patterns (The European Climate Adaptation Platform Climate-  
361 ADAPT: <https://climate-adapt.eea.europa.eu/>. Last accessed: October 2023). This lack of  
362 seasonality pattern may be due to the high ecological adaptability and plasticity of *A.*  
363 *albopictus*, with cold-acclimated adult mosquitoes and drought-resistant eggs.<sup>25</sup>

364 Portugal, being a significant tourist destination, experienced a substantial influx of international  
365 guests, with peaks in July, August, September, and October. This surge in tourism, equivalent  
366 to approximately 20% of the country's population in these months, may have a notable impact  
367 on the presence of DENV and CHIKV (Turismo de Portugal: <https://travelbi.turismodeportugal.pt/turismo-em-portugal/turismo-em-numeros-2022/>. Last  
368 accessed: October 2023). Portugal also attracted an increasing number of immigrants,  
369 including digital nomads from countries such as Brazil, the USA, and the UK, potentially  
370

371 contributing to the circulation of these viruses. Moreover, Portugal has direct flight around the  
372 year from Sub-Saharan Africa and Latin America, specially from countries that are former  
373 Portuguese territory.

374 In addition to its status as a significant tourism hub, Portugal has also emerged as an enticing  
375 destination for permanent residence (Instituto Nacional de Estatística:  
376 [https://www.ine.pt/xportal/xmain?xpid=INE&xpgid=ine\\_publicacoes&PUBLICACOESpub\\_bo](https://www.ine.pt/xportal/xmain?xpid=INE&xpgid=ine_publicacoes&PUBLICACOESpub_bo ui=65586079&PUBLICACOESmodo=2)  
377 [ui=65586079&PUBLICACOESmodo=2](https://www.ine.pt/xportal/xmain?xpid=INE&xpgid=ine_publicacoes&PUBLICACOESpub_bo ui=65586079&PUBLICACOESmodo=2). Last accessed: October 2023). Between December  
378 2021 and December 2022, Portugal's population experienced a notable increase of 46,249  
379 individuals, primarily driven by a net migration influx of nearly 87,000 people. This marked an  
380 uptick of nearly 15,000 migrants compared to the previous year (DGS: [https://www.dgs.pt/em-](https://www.dgs.pt/em-destaque/mosquito-aedes-albopictus-identificado-no-municipio-de-lisboa.aspx)  
381 [destaque/mosquito-aedes-albopictus-identificado-no-municipio-de-lisboa.aspx](https://www.dgs.pt/em-destaque/mosquito-aedes-albopictus-identificado-no-municipio-de-lisboa.aspx). Last  
382 accessed: October 2023).

383 Notably, the SARS-CoV-2 pandemic shifted established work norms towards remote  
384 employment, leading to a surge in digital nomads choosing Portugal as their touch base.  
385 Census data for the year 2021 reveals that Brazil, Italy, and India ranked among the top five  
386 nationalities of immigrants, with Brazil comprising nearly 30% of the total immigrant population  
387 (Instituto Nacional de Estatística:  
388 [https://www.ine.pt/xportal/xmain?xpid=INE&xpgid=ine\\_publicacoes&PUBLICACOESpub\\_bo](https://www.ine.pt/xportal/xmain?xpid=INE&xpgid=ine_publicacoes&PUBLICACOESpub_bo ui=65586079&PUBLICACOESmodo=2)  
389 [ui=65586079&PUBLICACOESmodo=2](https://www.ine.pt/xportal/xmain?xpid=INE&xpgid=ine_publicacoes&PUBLICACOESpub_bo ui=65586079&PUBLICACOESmodo=2). Last accessed: October 2023). Additionally, the  
390 number of immigrants from South Asian nations like India and Pakistan has experienced a  
391 steep rise in the mainland territory for the past two years since the last census. Major  
392 Portuguese cities, including Lisbon, Porto, Setúbal, Faro, and Braga, situated within the  
393 regions under study, attract the majority of immigrants and also host the highest influx of  
394 tourists. Consequently, the interplay between tourism to and from Portugal, coupled with the  
395 escalating immigrant population, may have played a role in influencing the positivity rates and  
396 concentrations of both viruses in the region.

397 Before this study, in the scope of another work particularly focusing on the fate of SARS-CoV-  
398 2 across the water cycle, we have detected, via shotgun viral metagenomic sequencing by  
399 Illumina, a densovirus (*Breviadenovirus* genus, subfamily *Densovirinae*) specific of *A.*  
400 *albopictus* (Cunha *et al.*, unpublished data). Detection of this densovirus in raw wastewater  
401 from the North, Algarve and LVT regions of Portugal was confirmed for a number of samples  
402 collected during 2021. Mosquito densoviruses exert mosquito-specific entomopathogenicity  
403 and their detection may also be used as proxy of mosquito occurrence. According to the  
404 ECDC, the distribution of *A. albopictus* in the mainland territory of Portugal between March  
405 2021 and August 2023 was confined to the North (Penafiel) and the Algarve regions (ECDC:  
406 [https://www.ecdc.europa.eu/en/publications-data/aedes-albopictus-current-known-](https://www.ecdc.europa.eu/en/publications-data/aedes-albopictus-current-known-distribution-august-2023)  
407 [distribution-august-2023](https://www.ecdc.europa.eu/en/publications-data/aedes-albopictus-current-known-distribution-august-2023). Last accessed: October 2023). However, using metagenomic  
408 detection of *A. albopictus* densovirus in wastewater as proxy for the presence of the mosquito  
409 vector, wastewater analyses was able to extend information on the spatial distribution of *A.*  
410 *albopictus* across the mainland territory, confirming for the first time its occurrence in the  
411 Lisbon area already back in 2021, a fact that only in 2023 was confirmed via classical mosquito  
412 trapping methods (DGS: [https://www.dgs.pt/em-destaque/mosquito-aedes-albopictus-](https://www.dgs.pt/em-destaque/mosquito-aedes-albopictus-identificado-no-municipio-de-lisboa.aspx)  
413 [identificado-no-municipio-de-lisboa.aspx](https://www.dgs.pt/em-destaque/mosquito-aedes-albopictus-identificado-no-municipio-de-lisboa.aspx). Last accessed: October 2023). This additional data  
414 supports the utility of WBS for understanding the circulation trends of arboviral pathogens and  
415 their vectors.

416 Despite the absence of reported DENV and CHIKV cases in Portugal, uncertainties persist  
417 regarding disease occurrence when testing wastewater. Information on the concentration of  
418 viral particles excreted by infected individuals, whether symptomatic or asymptomatic, or the  
419 concentration of these viruses in the vectors is limited and challenging to obtain. Wastewater



420 surveillance is not suitable for intervention at the individual level and cannot discriminate  
421 infection patterns from permanent and transient populations.

422 Nonetheless, this study successfully identified the presence and concentration of DENV and  
423 CHIKV, even in the absence of data for reported cases. The lack of reporting can be attributed  
424 to several factors, including the absence of symptoms, the presence of mild symptoms, or  
425 misdiagnosis. For example, it is estimated that only around 25% of DENV cases exhibit  
426 symptoms.<sup>5</sup> Moreover, both DENV and CHIKV can cause mild and common symptoms, such  
427 as fever, headache, muscle pain, and fatigue, which are also typical of SARS-CoV-2, influenza  
428 or other entero- or neurotropic viruses. This leads to a situation where asymptomatic  
429 individuals may not seek medical care, and even when they do, they may receive a  
430 misdiagnosis.

431 Continuous and active surveillance remains indispensable to timely detect and manage  
432 potential outbreaks caused by Dengue and Chikungunya viruses. The detection of *A.*  
433 *albopictus* dengueviruses across WWTP via unbiased metagenomic sequencing, together with  
434 tailored molecular diagnostic tests targeting the genome of specific arboviruses in wastewater,  
435 enrich the available surveillance toolbox for relevant arboviral diseases, which traditionally has  
436 been circumscribed to syndromic surveillance and vector trapping/testing. These novel  
437 approaches combining the information pool from wastewater and clinical samples amplify  
438 methodological choices for predicting the infection risk, aiding to prevent and mitigate potential  
439 Dengue and Chikungunya outbreaks. Furthermore, since mosquito surveillance and control  
440 remain the most effective strategy to prevent and reduce arboviruses transmission, integrating  
441 vector occurrence and distribution from wastewater data with ongoing harmonized  
442 surveillance of *Aedes* invasive mosquito species is crucial to mitigate human vector-borne  
443 diseases.

444 Further research is warranted to comprehensively understand the levels of arboviral excretion  
445 by symptomatic and asymptomatic individuals, patterns of infection, and vector dynamics.  
446 Such knowledge would enable accurate modeling of the number of infected individuals within  
447 a sewer system based on viral concentration, thereby facilitating the modeling of  
448 epidemiological parameters.<sup>26-27</sup> Nevertheless, WBS is poised to become an even more critical  
449 tool in combating arboviral diseases, both in endemic and non-endemic regions, as these  
450 areas are expected to become increasingly susceptible to diseases such as dengue and  
451 chikungunya.

452  
453 Contributors

454 SM contributed to the conceptualization of the study, the resources, data curation, writing of  
455 the original draft, reviewing and editing of subsequent drafts, visualization, and supervision.  
456 RP and FN contributed to the investigation. MVC contributed to reviewing and editing of the  
457 manuscript drafts. RS contributed to the conceptualization of the study, the resources, data  
458 curation, writing of the original draft, reviewing and editing of subsequent drafts, visualization,  
459 and supervision. All authors had access to all the data in the study and had final responsibility  
460 for the decision to submit for publication. SM and RS verified the underlying data of the study.

461  
462 Funding

463 This work was supported by the European Union through the Emergency Support Instrument  
464 [*Support to the Member States to establish national systems, local collection points, and digital*  
465 *infrastructure for monitoring Covid19 and its variants in wastewater – Portugal*; Grant  
466 Agreement No. 060701/2021/864489/SUB/ENV.C2] and by Fundação para a Ciência e  
467 Tecnologia (FCT), through the Joint Programming Initiative on Antimicrobial Resistance  
468 (JPIAMR) program, project Surveillance of Emerging Pathogens and Antibiotic Resistances in  
469 Aquatic Ecosystems (SARA), grant number Aquatic/0006/2020



470

471 Acknowledgments

472 We acknowledge the institutional support of *Ministério do Ambiente e Ação Climática* and of  
473 the *Direção Geral de Saúde*. We thank all the operational workers from water utilities [Águas  
474 de Portugal Group, AGERE and SMAS de Almada] who contributed to wastewater sampling.

## 475 **References**

- 476 1 LaBeaud AD, Bashir F, King CH. Measuring the burden of arboviral diseases: the spectrum  
477 of morbidity and mortality from four prevalent infections. *Popul Health Metr* 2011; **9**: 1. doi:  
478 10.1186/1478-7954-9-1
- 479 2 Garnas J, Auger-Rozenberg MA, Roques A, et al. Complex patterns of global spread in  
480 invasive insects: eco-evolutionary and management consequences. *Biol Invasions* 2016; **18**:  
481 935-952. Doi: 10.1007/s10530-016-1082-9
- 482 3 Robert MA, Stewart-Ibarra AM, Estallo E. Climate change and viral emergence from Aedes-  
483 borne arboviruses. *Curr Opin Virol* 2020; **40**: 41-47.
- 484 4 Messina JP, Brady OJ, Scott TW, et al. Global spread of Dengue virus types: mapping the  
485 70 year history. *Trends Microbiol* 2014; **22**: 138-146. Doi: 10.1016/j.tim.2013.12.011
- 486 5 Bhatt S, Gething PW, Brady, OJ, et al. The global distribution and burden of dengue. *Nature*  
487 2013; **496**: 504-507. Doi: 10.1038/nature12060
- 488 6 Guzman MG, Gubler DJ, Izquierdo A, Martinez E, Halstead SB. Dengue infection. *Nat Rev*  
489 *Dis Prim* 2016; **2**: 16055. Doi: 10.1038/nrdp.2016.55
- 490 7 Wahid B, Ali A, Rafique S, Idrees M. Global expansion of chikungunya virus: mapping the  
491 64-year history. *Int J Infect Dis* 2017; **58**: 69-76. Doi: 10.1016/j.ijid.2017.03.006
- 492 8 Yew YW, Ye, T, Ang LW, et al. Seroepidemiology of Dengue virus infection among adults in  
493 Singapore. *Ann Acad Med Singap* 2009; **38**: 667-675
- 494 9 Musso D, Rodriguez-Morales AJ, Levi JE, Cao-Lormeau VM, Gubler DJ. Unexpected  
495 outbreaks of arbovirus infections: lessons learned from the pacific and tropical America.  
496 *Lancet Infect Dis* 2018; **18**: e355-e361. doi: 10.1016/S1473-3099(18)30269-X
- 497 10 Bowman LR, Runge-Ranzinger S, McCall PJ. Assessing the relationship between vector  
498 indices and dengue transmission: a systematic review of the evidence. *PLoS Negl Trop Dis*  
499 2014; **8**: e2848. Doi: 10.1371/journal.pntd.0002848
- 500 11 Tambo E, Khayeka-Wandabwa C, Olalubi AO, Adedeji AA, Ngogang JY, Khater EIM.  
501 Addressing knowledge gaps in molecular, sero-surveillance and monitoring approaches on  
502 Zika epidemics and other arbovirus co-infections: a structured review. *Parasite Epidemiol*  
503 *Control* 2017; **2**: 50-60. doi: 10.1016/j.parepi.2017.01.001
- 504 12 European Centre for Disease Prevention and Control. Dengue outbreak in Madeira,  
505 Portugal, March 2013. Stockholm, ECDC, 2014.
- 506 13 Naughton C. COVIDPoops19 Summary of Global SARS-CoV-2 wastewater monitoring  
507 efforts.  
508 <https://ucmerced.maps.arcgis.com/apps/dashboards/c778145ea5bb4daeb58d31afee389082>  
509 last accessed: 30 august 2023)
- 510 14 Andries AC, Duong V, Ly S, et al. Value of routine dengue diagnostic tests in urine and  
511 saliva specimens. *PLoS Negl Trop Dis* 2015; **9**: e0004100. doi: 10.1371/journal.pntd.0004100
- 512 15 Chandra F, Lee WL, Armas F, et al. Persistence of Dengue (serotypes 2 and 3), Zika, Yellow  
513 Fever, and murine hepatitis virus RNA in untreated wastewater. *Environ Sci Technol Lett* 2021;  
514 **8**: 785-791. Doi: 10.1021/acs.estlett.1c00517
- 515 16 Wilder ML, Middleton F, Larsen DA, et al. Co-quantification of crAssphage increases  
516 confidence in wastewater-based epidemiology for SARS-CoV-2 in low prevalence areas.  
517 *Water Res. X* 2021; **11**: 100100. doi: 10.1016/j.wroa.2021.100100
- 518 17 Monteiro S, Rente D, Cunha MC, et al. A wastewater-based epidemiology tool for COVID-  
519 19 surveillance in Portugal. *Sci Total Environ* 2022; **804**: 150264. doi:  
520 10.1016/j.scitotenv.2021.150264
- 521 18 Gurukumar KR, Priyadarshini D, Patil JA, et al. Development of a real time PCR for  
522 detection and quantification of Dengue viruses. *Virol J* 2009; **6**: 10. Doi: 10.1186/1743-422X-  
523 6-10
- 524 19 Panning M, Grywna K, van Esbroeck M, Emmerich P, Drosten C. Chikungunya fever in  
525 travelers returning to Europe from the Indian Ocean region, 2006. *Emerg Infect Dis* 2008;  
526 **14(3)**: 416-422. doi: 10.3201/eid1403.070906
- 527 20 Lanciotti RS, Kosoy OL, Laven JJ, et al. Chikungunya virus in US travelers returning from  
528 India, 2006. *Emerg Infect Dis* 2007; **13(5)**: 764-767. doi: 10.3201/eid1305.070015

- 529 21 Stachler E, Kelty C, Sivaganesan M, Li X, Bibby K, Shanks OC. Quantitative crAssphage  
530 PCR assays for human fecal pollution measurement. *Environ Sci Technol* 2017; **51**: 9146-  
531 9154.
- 532 22 Ahmed W, Payyappat S, Cassidy M, Besley C. A duplex PCR assay for the simultaneous  
533 quantification of Bacteroides HF183 and crassphage CPQ\_056 marker genes in untreated  
534 sewage and stormwater. *Environ Int* 2019; **126**: 252-259. doi: 10.1016/j.envint.2019.01.035
- 535 23 Cuevas-Ferrando E, Pérez-Cataluña A, Falcó I, Randazzo W, Sánchez G. Monitoring  
536 human viral pathogens reveals potential hazard for treated wastewater discharge or reuse.  
537 *Front Microbiol* 2022; **13**: 836193. doi: 10.3389/fmicb.2022.836193
- 538 24 Irekeola AA, Syafirah EA, Islam MdA, Shueb RH. Global prevalence of dengue and  
539 chikungunya coinfection: a systematic review and meta-analysis of 43,341 participants. *Acta*  
540 *Trop* 2022; **231**: 106408. doi: 10.1016/j.actatropica.2022.106408
- 541 25 Giunti G, Becker N, Benelli G. Invasive mosquito vectors in Europe: from bioecology to  
542 surveillance and management. *Acta Trop* 2023; **239**: 106832. doi:  
543 [10.1016/j.actatropica.2023.106832](https://doi.org/10.1016/j.actatropica.2023.106832)
- 544 26 Soller J, Jennings W, Schoen M., et al. Modelling infection from SARS-CoV-2 wastewater  
545 concentrations: promise, limitations, and future directions. *J Water Health* 2022; **20**: 1197-  
546 1211. Doi: 10.2166/wh.2022.094.
- 547 27 Huisman JS, Scire J, Caduff L, et al. Wastewater-base estimation of the effective  
548 reproductive number of SARS-CoV-2. *Environ. Health Perspect* 2022; **130**: 57011. doi:  
549 10.1289/EHP10050
